# Supplementary material
Source: PubMed Central journal article supplement (PMC4272746)
Supplement: AEM.02871-14_zam999105891so1.pdf [file AEM.02871-14_zam999105891so1.pdf]

# 1 SUPPLEMENTARY MATERIAL

2

## 3 TABLES

4

5

**Table S1. Oligonucleotide Primers used in this Study**

| <i>Purpose</i>                                                                               | <i>Primer</i>                | <i>Sequence<sup>a</sup></i>                                                           |
|----------------------------------------------------------------------------------------------|------------------------------|---------------------------------------------------------------------------------------|
| Cloning of internal 937bp fragment of <i>gosD</i> in pORI19                                  | IM199F<br>IM199R             | <b>tgcggaagctt</b> cgatgattacgagcccacgtac<br>ctatg <b>ctctaga</b> gttgcccttcgagtcgtac |
| Amplification of tetW                                                                        | tetWFw<br>tetWRv             | tcagctgctgacatgctcatgtacggtaaggaagca<br>gcgacggtcgaccataactctgattgtgccg               |
| Confirmation of site specific homologous recombination                                       | pORI19 for<br>0199-FW        | Attgtgagcggataacaatttcac<br>caagagtcagaaccgatcg                                       |
| Amplification of internal fragment of chromosomal encoded gene from <i>B. breve</i> JCM 7017 | 7017_1848f<br>7017_1848r     | cagaagtcaccaacgtcaag<br>gattccggcaagatccacctg                                         |
| Amplification of internal fragment pMP7017 encoded gene 7017pl_0024                          | 7017pl_0024f<br>7017pl_0024r | gaaccaccaagctgcctgacgac<br>gtgaagctttatcctgggcacg                                     |
| Amplification of internal fragment of UCC2003 <i>rbsA</i>                                    | rbsAF<br>rbsAR               | caagaggcgtgggtatggtatc<br>actcgcgaccaacatcaacacc                                      |

6

<sup>a</sup> Restriction sites incorporated into oligonucleotide primer sequences are indicated in bold

7

8

9

1 **Table S2. Genes displaying a deviating codon usage in pMP7017.**

2

| <i>ORF</i>   | <i>Product</i>                                                                                                             |
|--------------|----------------------------------------------------------------------------------------------------------------------------|
| pMP7017_0002 | hypothetical protein                                                                                                       |
| pMP7017_0013 | hypothetical protein                                                                                                       |
| pMP7017_0014 | Conserved hypothetical protein with a helix-turn-helix motif                                                               |
| pMP7017_0023 | Cell surface protein precursor with Cna protein B-type domain and Gram-positive cocci surface proteins LPxTG motif profile |
| pMP7017_0041 | hypothetical protein                                                                                                       |
| pMP7017_0043 | hypothetical protein                                                                                                       |
| pMP7017_0044 | hypothetical protein                                                                                                       |
| pMP7017_0045 | hypothetical protein                                                                                                       |
| pMP7017_0048 | hypothetical protein                                                                                                       |
| pMP7017_0050 | transposase                                                                                                                |
| pMP7017_0058 | hypothetical protein                                                                                                       |
| pMP7017_0068 | hypothetical protein                                                                                                       |
| pMP7017_0071 | hypothetical protein                                                                                                       |
| pMP7017_0075 | hypothetical protein                                                                                                       |
| pMP7017_0081 | hypothetical protein                                                                                                       |
| pMP7017_0091 | hypothetical protein                                                                                                       |
| pMP7017_0099 | transposase                                                                                                                |
| pMP7017_0101 | Acetyltransferase                                                                                                          |
| pMP7017_0107 | hypothetical protein                                                                                                       |
| pMP7017_0110 | hypothetical protein                                                                                                       |
| pMP7017_0111 | hypothetical protein                                                                                                       |
| pMP7017_0115 | hypothetical protein                                                                                                       |
| pMP7017_0119 | hypothetical protein                                                                                                       |
| pMP7017_0120 | HipA domain-containing protein                                                                                             |
| pMP7017_0121 | hypothetical protein                                                                                                       |
| pMP7017_0127 | hypothetical protein with putative flagellar basal body-associated domain protein                                          |
| pMP7017_0132 | hypothetical protein                                                                                                       |
| pMP7017_0136 | Protein translocase subunit secE                                                                                           |
| pMP7017_0139 | hypothetical protein                                                                                                       |
| pMP7017_0144 | methyltransferase domain protein                                                                                           |
| pMP7017_0151 | hypothetical protein                                                                                                       |
| pMP7017_0155 | hypothetical protein                                                                                                       |
| pMP7017_0157 | hypothetical protein                                                                                                       |
| pMP7017_0158 | hypothetical protein                                                                                                       |
| pMP7017_0159 | hypothetical protein                                                                                                       |
| pMP7017_0162 | hypothetical protein                                                                                                       |
| pMP7017_0166 | hypothetical protein                                                                                                       |
| pMP7017_0169 | hypothetical protein                                                                                                       |
| pMP7017_0172 | hypothetical protein                                                                                                       |
| pMP7017_0173 | hypothetical protein                                                                                                       |
| pMP7017_0175 | hypothetical protein                                                                                                       |
| pMP7017_0177 | transposase                                                                                                                |
| pMP7017_0182 | hypothetical protein                                                                                                       |
| pMP7017_0186 | Conserved hypothetical secreted protein with NlpC/P60 family domain                                                        |
| pMP7017_0198 | Single-strand DNA binding protein                                                                                          |

|                     |                                                                                                                                                                  |
|---------------------|------------------------------------------------------------------------------------------------------------------------------------------------------------------|
| <b>pMP7017_0200</b> | Conserved hypothetical secreted protein with prokaryotic membrane lipoprotein lipid attachment site and Gram-positive cocci surface proteins LPxTG motif profile |
| <b>pMP7017_0202</b> | Conserved hypothetical protein                                                                                                                                   |
| <b>pMP7017_0204</b> | Hypothetical secreted protein                                                                                                                                    |
| <b>pMP7017_0205</b> | hypothetical protein                                                                                                                                             |
| <b>pMP7017_0206</b> | Hypothetical protein                                                                                                                                             |
| <b>pMP7017_0208</b> | hypothetical protein                                                                                                                                             |
| <b>pMP7017_0210</b> | hypothetical protein                                                                                                                                             |
| <b>pMP7017_0211</b> | hypothetical protein                                                                                                                                             |
| <b>pMP7017_0212</b> | hypothetical protein                                                                                                                                             |
| <b>pMP7017_0213</b> | hypothetical protein                                                                                                                                             |
| <b>pMP7017_0215</b> | hypothetical protein                                                                                                                                             |
| <b>pMP7017_0216</b> | hypothetical protein                                                                                                                                             |
| <b>pMP7017_0219</b> | hypothetical protein                                                                                                                                             |
| <b>pMP7017_0226</b> | hypothetical protein                                                                                                                                             |
| <b>pMP7017_0229</b> | hypothetical protein                                                                                                                                             |
| <b>pMP7017_0230</b> | hypothetical protein                                                                                                                                             |

---

3

4

1 **Table S3. CRISPR/Cas repeats in pMP7017 and *B. longum* subsp. *longum*.**

2

| <i>CRISPR system</i>   | <i>Direct repeat</i>            | <i>Repeat variant</i>                                                                                     | <i>Terminal repeat</i>          | <i>Locus length (bp)</i> | <i>Spacers</i> |
|------------------------|---------------------------------|-----------------------------------------------------------------------------------------------------------|---------------------------------|--------------------------|----------------|
| <b>pMP7017_CRISPR1</b> | ACCTACCCCGCAGGCGCGGGGATAAACC    | ACCTACCCCGCAGGCGCGGGGATAAACC                                                                              | ATCTACCCCGCAGGCGCGGGGATAAACC    | 636                      | 10             |
| <b>p1-6B CRISPR1</b>   | TACCTACCCCGCACACGCGGGGATAAACCTT | N/A                                                                                                       | AACCTACCCCGCACATGCGGGGATAAACCTG | 152                      | 2              |
| <b>p44B CRISPR1</b>    | TACCTACCCCGCACACGCGGGGATAAACCTT | N/A                                                                                                       | AACCTACCCCGCACATGCGGGGATAAACCTG | 152                      | 2              |
| <b>p2-2B CRISPR1</b>   | ACCTACCCCGCAGGCGCGGGGATAAAA     | ACCTACCCCGCAGGCGCGGGGATAAACCTACCCCGCACACGCGGGGATAAACCTACCCCGCACACGCGGGGATAAAATGCCTACCCCGCACACGAGGGGATAAAA | ACCTACCTCGTACACGCGGGGATAAA      | 642                      | 10             |
| <b>pMP017_CRISPR2</b>  | ATCTACCCCGCACATGCGGGGATAAACC    | ATCTACCCCGCACACGCGGGGATAAACC<br>ATCTACCCCGCACGCGGGGATAAACC<br>ATCTACCCCGCATGCGGGGATAAACC                  | ATCTACCCCGCACACGCGGGGATAAACC    | 942                      | 15             |
| <b>p1-6B CRISPR2</b>   | ATCTACCCCGCACACGCGGGGATAAACC    | N/A                                                                                                       | ATCTACCCCGCACATGCGGGGATAAACC    | 1240                     | 20             |
| <b>p44B CRISPR2</b>    | ATCTACCCCGCACACGCGGGGATAAACC    | CATCTACCCCGCACACGCGGGGATAAACC<br>AATCTACCCCGCACACGCGGGGATAAACC                                            | N/A                             | 751 ++                   | 12 ++          |
| <b>P2-2B CRISPR2</b>   | ATCTACCCCGCACACGCGGGGATAAACC    | N/A                                                                                                       | N/A                             | 88 ++                    | 1 ++           |

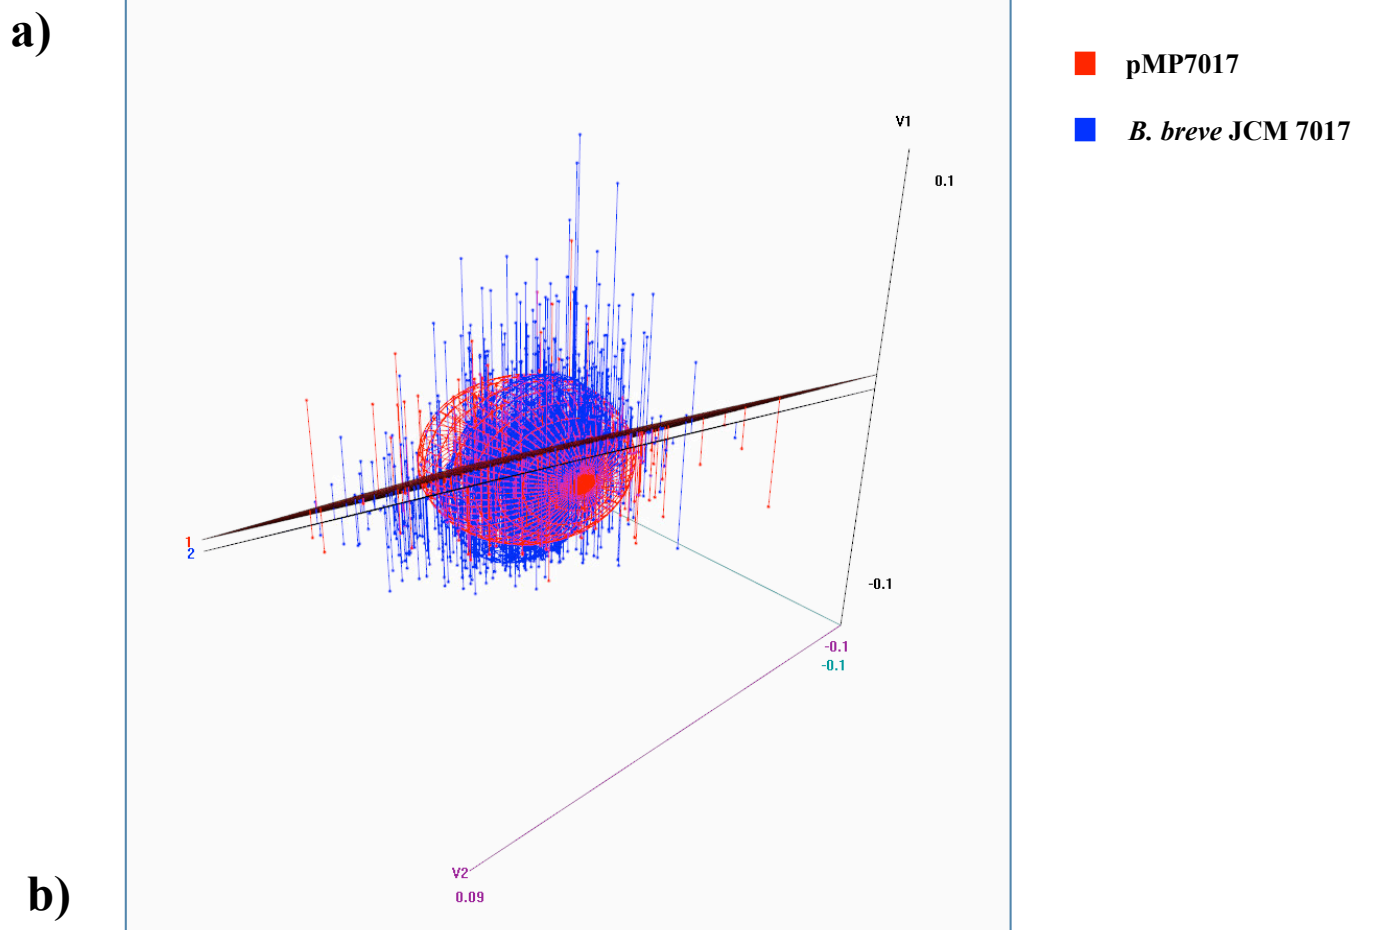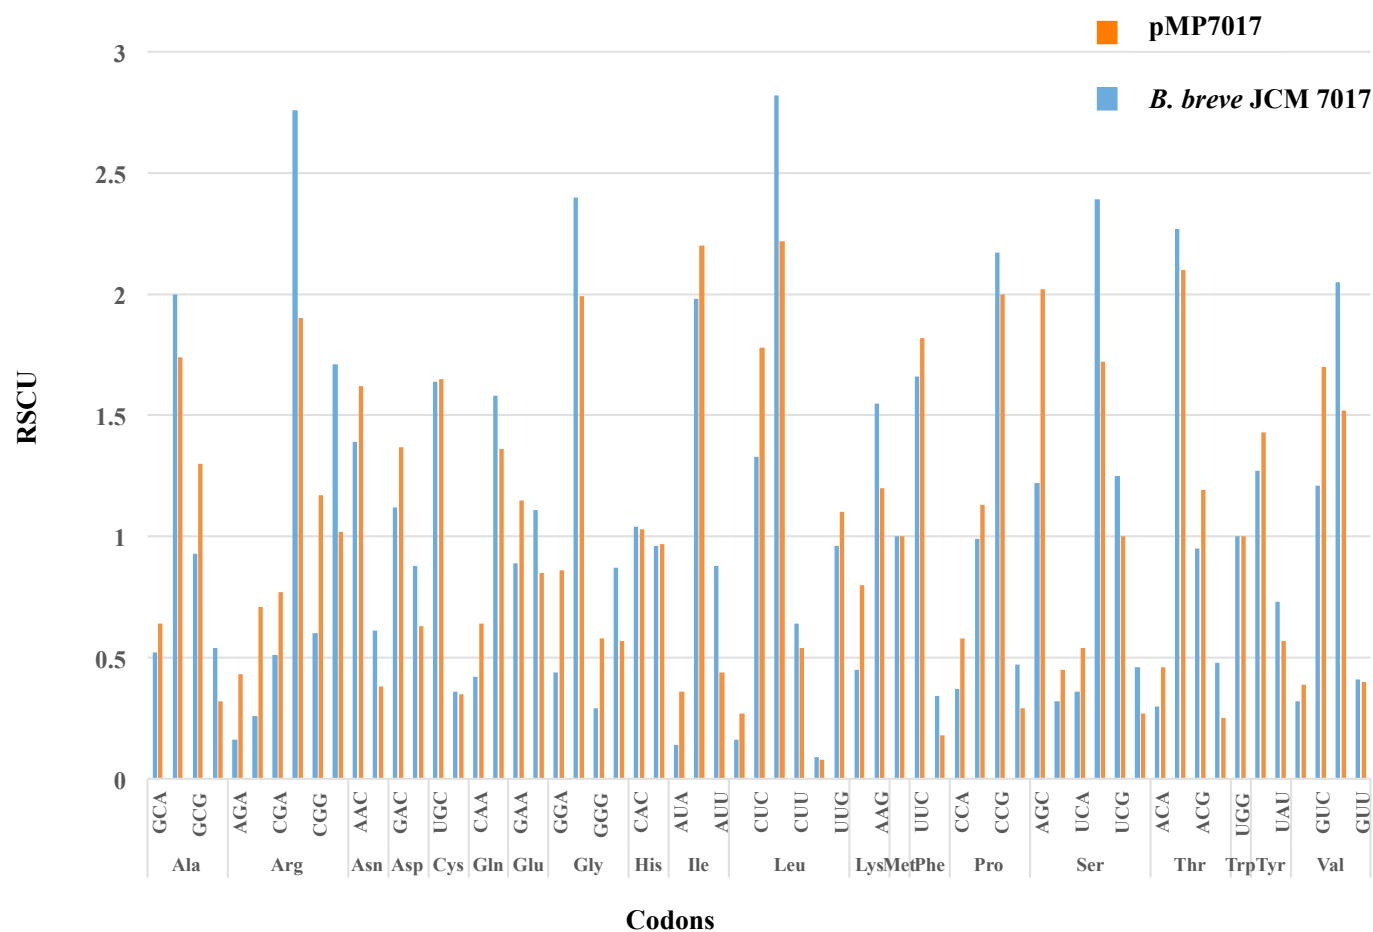

Figure S2

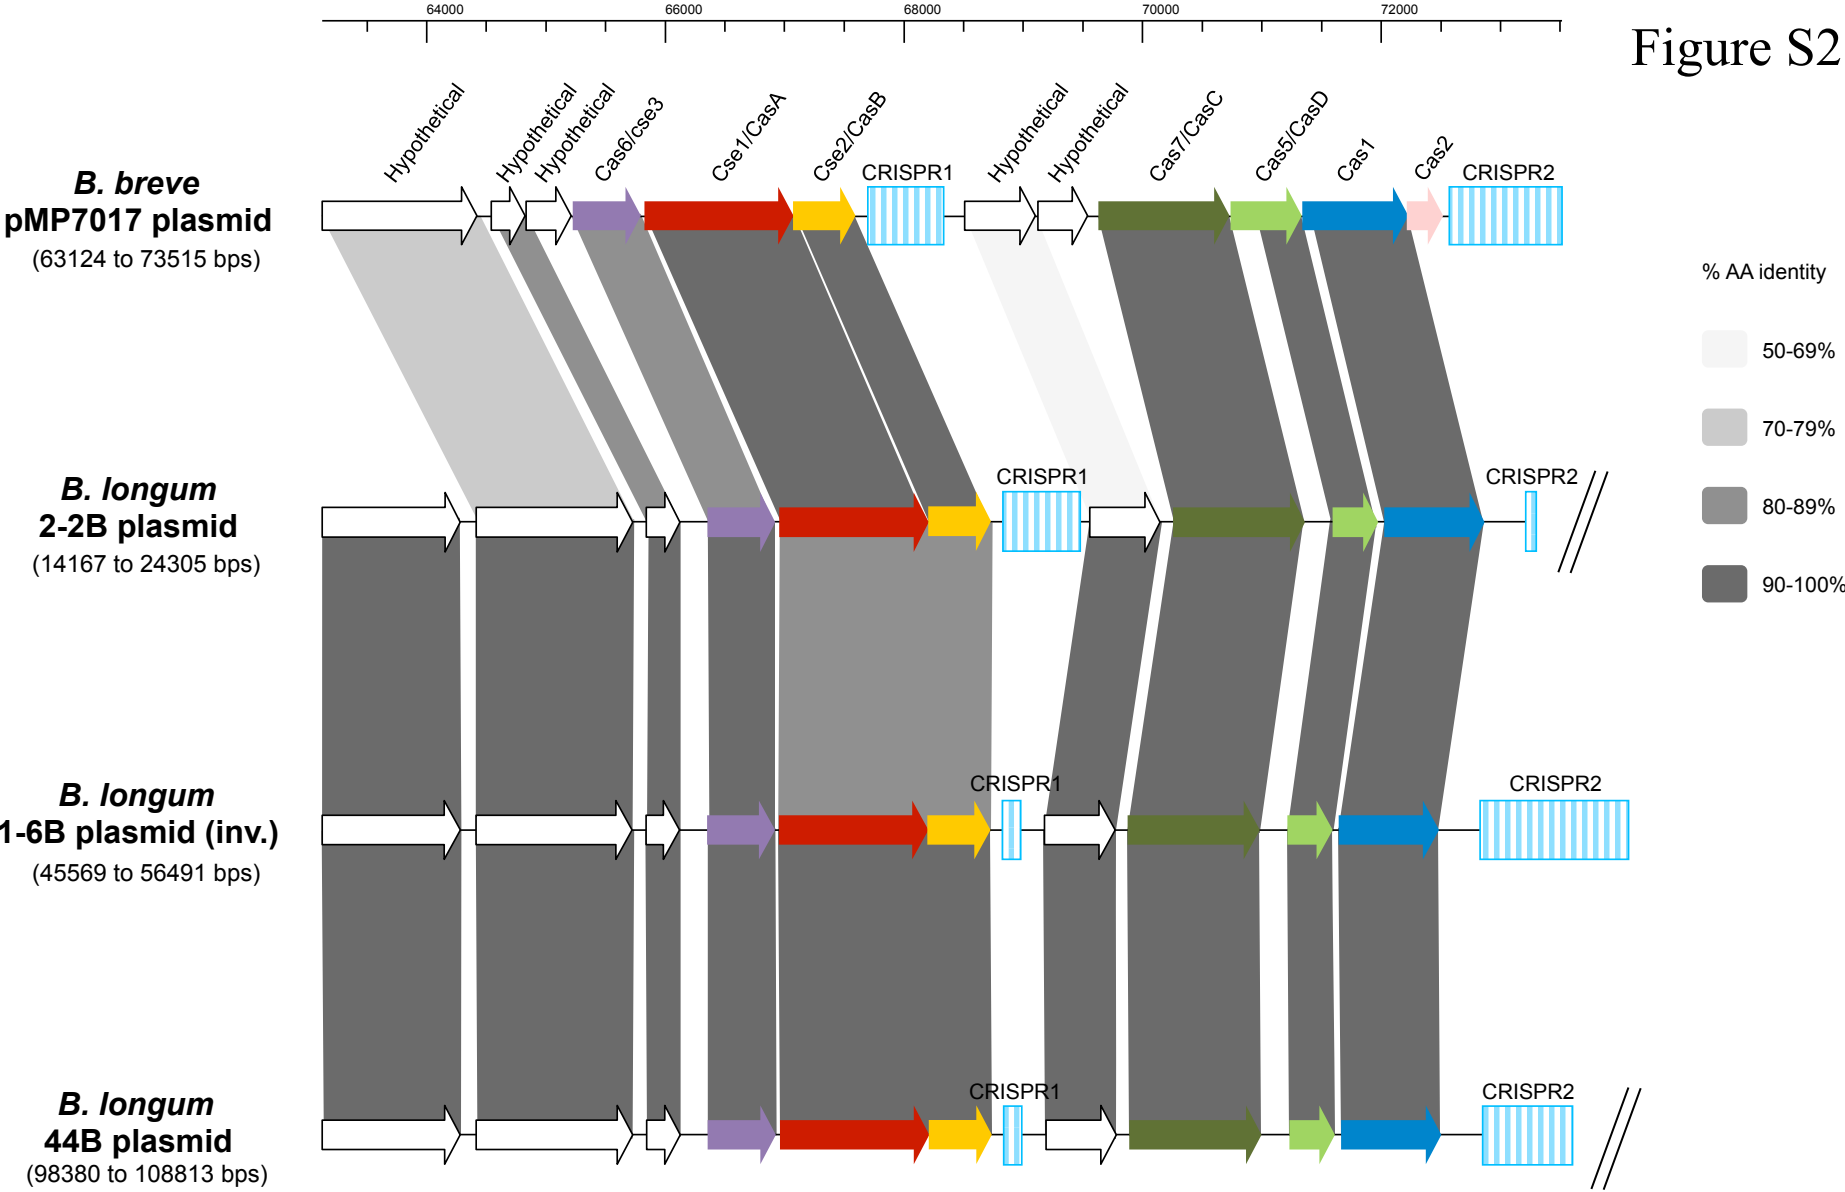

Figure S3

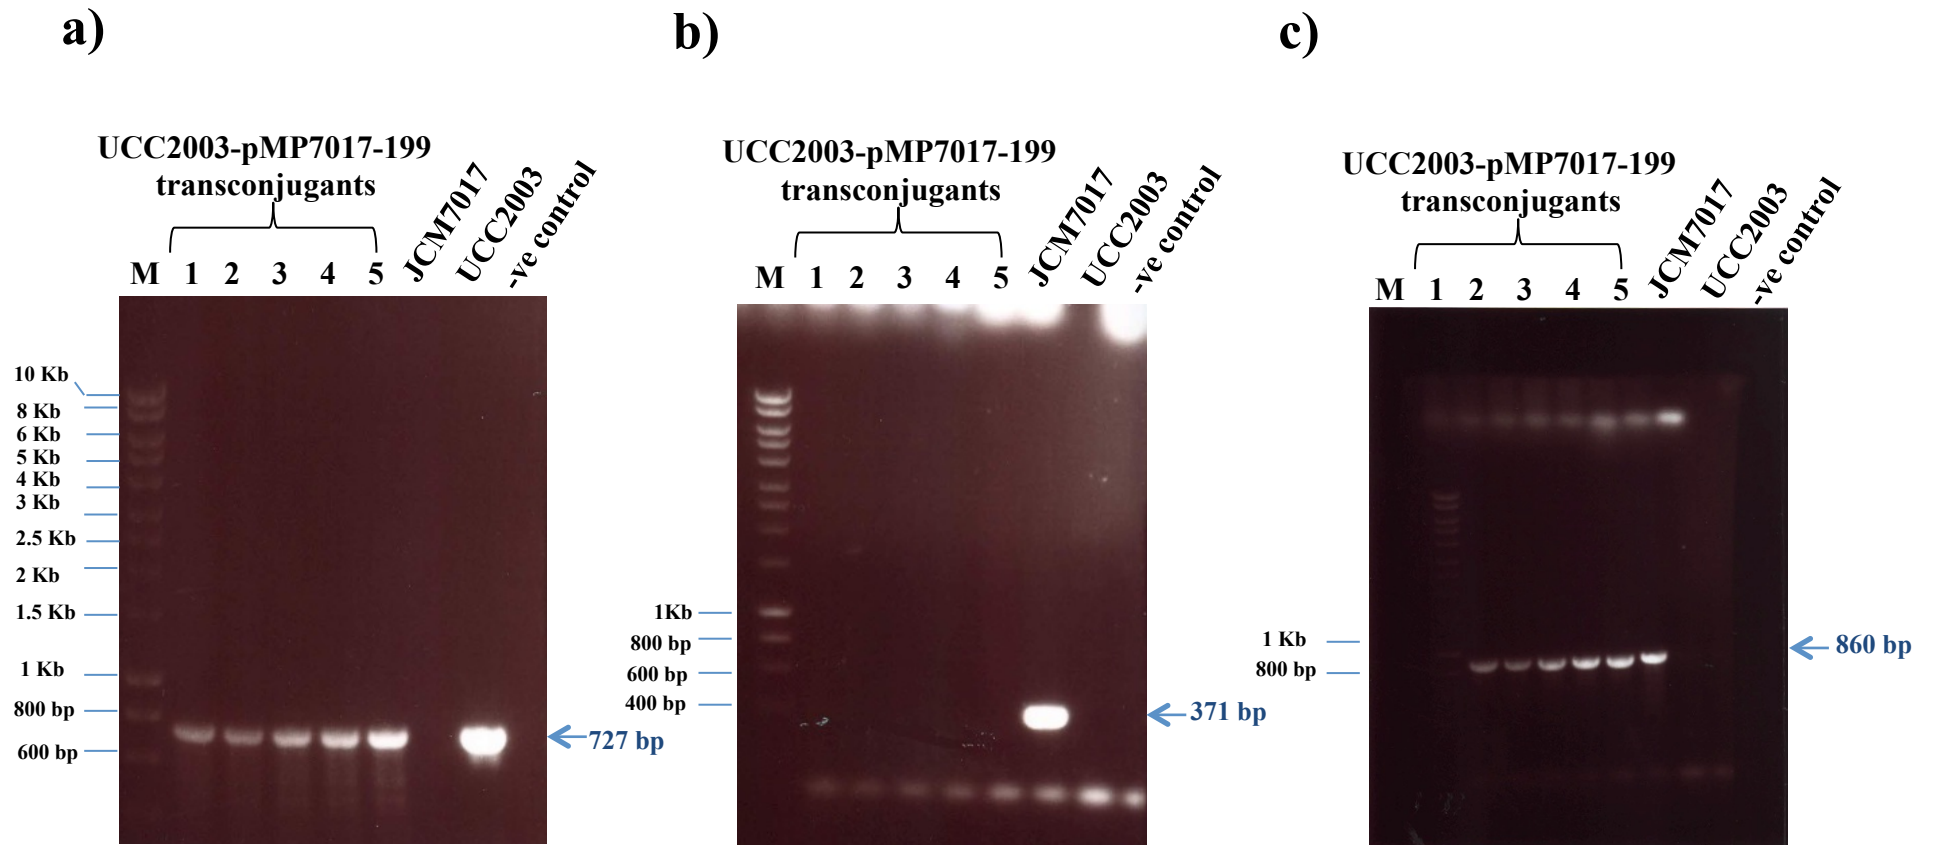

# 1 **FIGURE LEGENDS**

2

## 3 **Figure S1. Codon usage comparison of pMP7017 and the host.**

4 a) 3D scatterplot representing principal component analysis (PCA) conducted on the  
5 predicted ORFs of plasmid (red) and host (blue) and computed using scatter3D  
6 module implemented in the statistical package R. As indicated by the overlap of  
7 the relative regression surfaces (red and blue spheres), codon usage of host fits  
8 with that of the plasmid.

9 b) Bidimensional barplot indicating the relative synonymous codon usage value  
10 (RSCU) computed for of all the codons encountered in the plasmid (orange) and  
11 the host (pale blue).

12

## 13 **Figure S2. Presence of CRISPR/Cas systems in pMP7017 and *B. longum* subsp.** 14 ***longum*.**

15 Locus map showing the comparison of the CRISPR/Cas system of pMP7017  
16 megaplasmid and the draft sequence online available of *B. longum* subsp *longum* 1-  
17 6B, *B. longum* subsp. *longum* 2-2B, *B. longum* subsp. *longum* 44B.

18

## 19 **Figure S3. PCR confirmation of UCC2003 pMP7017 transconjugants.** Colony

20 PCRs on five *B. breve* UCC2003 pMP7017-199 transconjugants was performed using  
21 primer pairs that amplify an internal fragment of (a) *B. breve* UCC2003 rbsA, (b) *B.*  
22 *breve* JCM7017 7017\_1848 and (c) pMP7017\_0024. Molecular weight marker (M) is  
23 included in each gel. Control PCRs were performed incorporating DNA of either *B.*  
24 *breve* UCC2003, *B. breve* JCM7017 or no DNA.
